# Supplementary material for: A Leucine-Rich Repeat Receptor-like Kinase TaBIR1 Contributes to Wheat Resistance against Puccinia striiformis f. sp. tritici
Source: MDPI journal article supplement (doi:10.3390/ijms24076438), 2023-03-29
Supplement: s1 [file s1]

## Supplementary

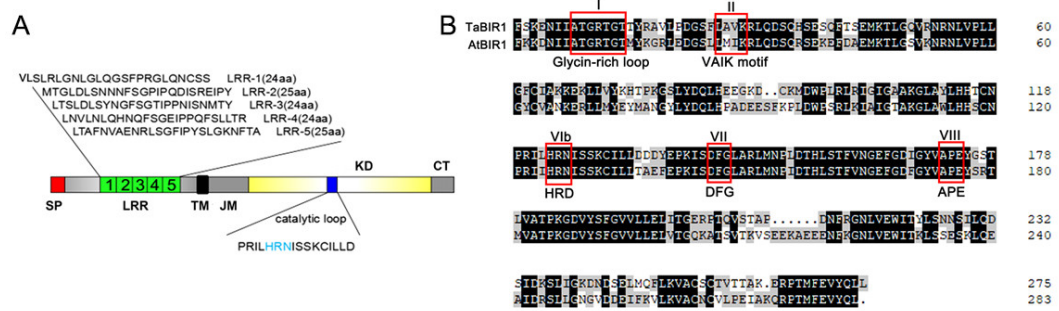

**Figure S1.** Bioinformatics analysis and sequence alignment for *TaBIR1*. (A) Schematic diagram of *TaBIR1* protein. SP, signal peptide; LRR, leucine-rich repeat motif; TM, transmembrane domain; JM, juxtamembrane domain; KD, kinase domain; CT, carboxyl-terminal. (B) Multiple alignment of intracellular kinase domains of *TaBIR1* and its homologue *AtBIR1* in Arabidopsis. The conserved subdomains were marked in red boxes.

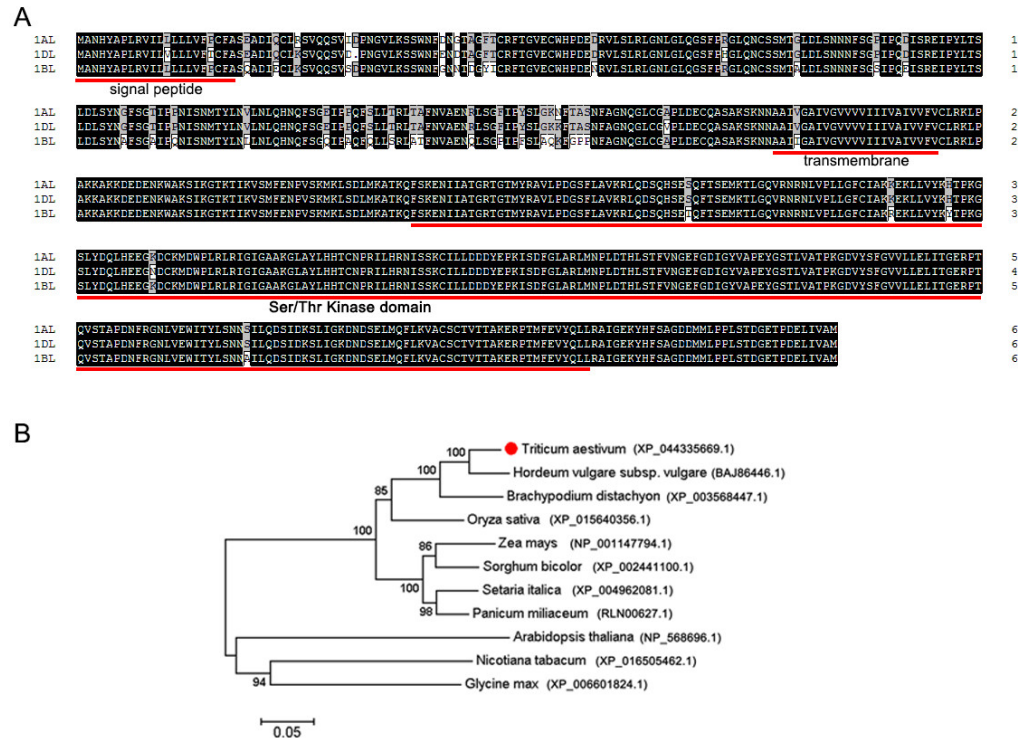

**Figure S2.** (A) Protein sequences alignment of the three homeologues of *TaBIR1* from wheat A/B/D subgenomes. The red lines indicated the signal peptide, transmembrane

domain and cytoplasmic serine/threonine kinase domain of TaBIR1. (B) Phylogenetic relationship of TaBIR1 and the homologous proteins. The tree was carried out with the MEGA7 software by the neighbour-joining method.

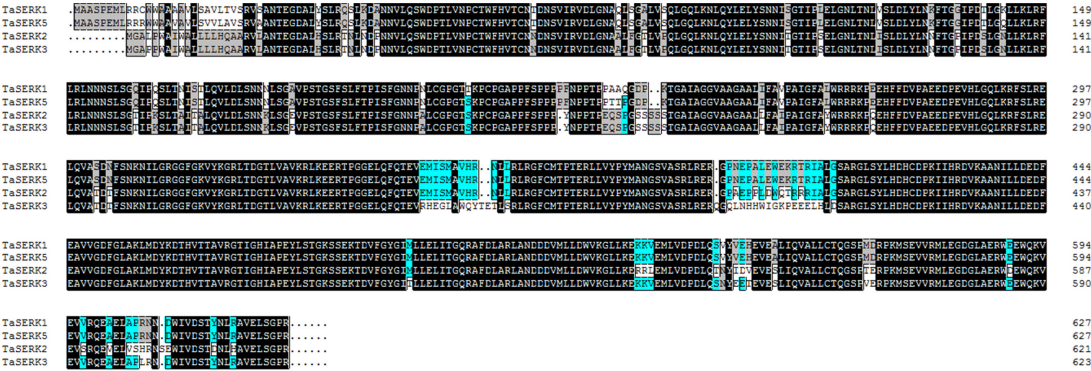

**Figure S3.** Sequences alignment of four wheat TaSERKs. The reference sequences were retrieved from Accession no. AK333001(*TaSERK1*); Accession no. AK333677.1(*TaSERK2*) ; Accession no. BT009223(*TaSERK3*); Accession no. BT009426 (*TaSERK5*) in NCBI database followed by a cDNA clone in wheat variety Su11. The protein sequences alignment were achieved by DNAMAN6.0 software.

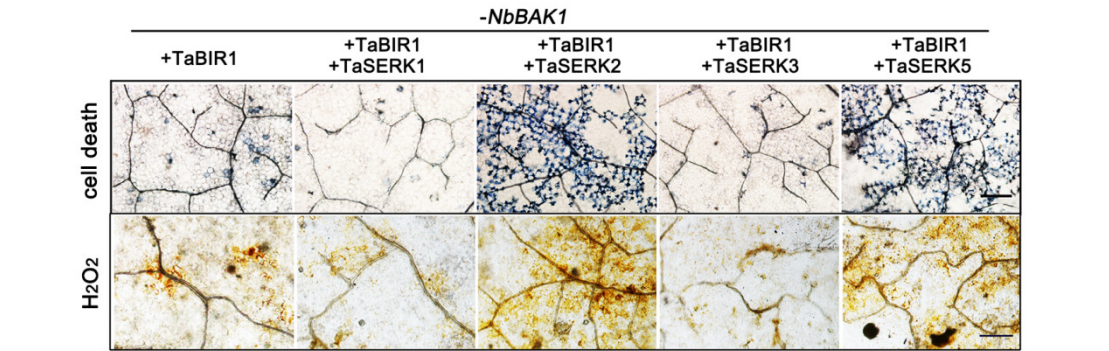

**Figure S4.** ROS accumulation and cell death in *NbBAK1* silencing plant leaves coexpressing TaBIR1 and TaSERKs. Two weeks after inoculation of TRV2:*NbBAK1*, *TaSERKs* and *TaBIR1* were co-expressed in the corresponding plant leaves. Forty-eight hours later, the leaves were collected for trypan blue staining and DAB staining for observations of cell death and H<sub>2</sub>O<sub>2</sub>. Similar results were obtained in three independent experiments. Bars, 100 μm.

**Table S1.** Primers used in this study.

| Primer name  | Sequence(5'-3')     | Purpose             |
|--------------|---------------------|---------------------|
| TaBIR1-qRT-F | GTAATCAAGGGCTATGTGG | qRT-PCR analysis in |

|                              |                                                    |                                             |
|------------------------------|----------------------------------------------------|---------------------------------------------|
| TaBIR1-qRT-R                 | TCCTTTTTTGCTTTCTTGGC                               | wheat (also for VIGS efficiency)            |
| TaBIR1(VI GS-1)- $\gamma$ -F | TTAGCTAGCTGATTAATTAATCAGCAGTCAGTGAT TGACCC         | vectors construction for wheat VIGS         |
| TaBIR1(VI GS-1)- $\gamma$ -R | TCCGTTGCTAGCTGAGCGGCCGCTACAATTCTGA AGACCGCGA       |                                             |
| TaBIR1(VI GS-2)- $\gamma$ -F | TTAGCTAGCTGATTAATTAATCATTCTCGGCCGG GGACG           |                                             |
| TaBIR1(VI GS-2)- $\gamma$ -R | TCCGTTGCTAGCTGAGCGGCCGCTGCAGCGTACC GCTACTCCAC      |                                             |
| GFP-VIGS- $\gamma$ -F        | TTAGCTAGCTGATTAATTAATGATATAGACGTTGT GGCTGTTGT      |                                             |
| GFP-VIGS- $\gamma$ -R        | TCCGTTGCTAGCTGAGCGGCCGCGACGACGACTTC TTCAAGTCCGCCAT |                                             |
| qRT-TaEF-F                   | TGGTGTCATCAAGCCTGGTATGGT                           | qRT-PCR analysis of PTI genes in wheat VIGS |
| qRT-TaEF-R                   | ACTCATGGTGCATCTCAACGGACT                           |                                             |
| qRT-PsEF-F                   | TTCGCCGTCCGTGATATGAGACAA                           |                                             |
| qRT-PsEF-R                   | ATGCGTATCATGGTGGTGGAGTGA                           |                                             |
| qRT-TaPR1-F                  | AAACAACATCCATCAAAACCA                              |                                             |
| qRT-TaPR1-R                  | ATTACCAGGTGGATCATAGTTACA                           |                                             |
| qRT-TaPR2-F                  | AGGATGTTGCTTCCATGTTTGCCG                           |                                             |
| qRT-TaPR2-R                  | AAGTAGATGCCCATGCCGTTGATG                           |                                             |
| Biomass-PstEF-F              | TTCGCCGTCCGTGATATGAGACAA                           | Biomass detection in wheat VIGS             |
| Biomass-PstEF-R              | ATGCGTATCATGGTGGTGGAGTGA                           |                                             |
| Biomass-WheatEF-F            | TGACCAGATCAACGAGCC                                 |                                             |
| Biomass-WheatEF-R            | CTCCAGGAGAGACTCATG                                 |                                             |
| TaBIR1full - 16318GFP        | AGAGGACAGCCCAAGCTTATGGCAAATCATTATG CTCCT           | vector construction for subcellular         |

|                                             |                                                   |                                                                           |
|---------------------------------------------|---------------------------------------------------|---------------------------------------------------------------------------|
| -F                                          |                                                   | localization in wheat                                                     |
| TaBIR1full<br>-<br>16318GFP<br>-R           | GCCCTTGCTCACCATGGATCCCATGGCGACAATG<br>AGCTC       |                                                                           |
| TaBIR1full<br>-<br>pCAMBI<br>A1302GFP<br>-F | CATGGTAGATCTGACTAGTATGGCAAATCATTATG<br>CTCCT      | vector construction for subcellular localization in <i>N. benthamiana</i> |
| TaBIR1full<br>-<br>pCAMBI<br>A1302GFP<br>-R | GCCCTTGCTCACCATCCTAGGCATGGCGACAATG<br>AGCT        |                                                                           |
| TaBIR1-<br>GFP-F                            | CTGTACAAGGGTACCCCCGGGATGGCAAATCATT<br>ATGCTCCT    | vectors construction for TaBIR1 overexpression in <i>N. benthamiana</i>   |
| TaBIR1-<br>GFP-R                            | TCTAGTTCATCTAGAGGATCCTTACATGGCGACAA<br>TGAGCT     |                                                                           |
| qRT-<br>NbActin-F                           | TGGTCGTACCACCGGTATTGTGTT                          | qRT-PCR analysis of PTI gene in <i>N. benthamiana</i>                     |
| qRT-<br>NbActin-<br>R                       | TCACTTGCCCATCAGGAAGCTCAT                          |                                                                           |
| qRT-<br>NbPR1-F                             | CCGCCTTCCCTCAACTCAAC                              |                                                                           |
| qRT-<br>NbPR1-R                             | GCACAACCAAGACGTACTGAG                             |                                                                           |
| qRT-<br>NbPR2-F                             | AGGTGTTTGCTATGGAATGC                              |                                                                           |
| qRT-<br>NbPR2-R                             | TCTGTACCCACCATCTTGC                               |                                                                           |
| TaBIR1full<br>-(LUC-N)-<br>F                | AACACGGGGGACGAGCTCGGTACCATGGCAAAT<br>CATTATGCTCCT | vectors construction for interaction of luciferase complementation assay  |
| TaBIR1full<br>-(LUC-N)-<br>R                | TCCTTGTAGTCCATTTGTTGGATCCCGCATGGCGA<br>CAATGAGCTC |                                                                           |
| TaBIR1full<br>-(LUC-C)-<br>F                | AGAGAACACGGGGGACGAGCTCATGGCAAATCA<br>TTATGCTCCT   |                                                                           |
| TaBIR1full                                  | GTTTACATAACCGGACATGAGCTCCATGGCGACA                |                                                                           |

|                                         |                                                                 |                                                     |
|-----------------------------------------|-----------------------------------------------------------------|-----------------------------------------------------|
| -(LUC-C)-<br>R                          | ATGAGCTC                                                        |                                                     |
| TaSERK1-<br>(LUC-N)-<br>F               | AACACGGGGGACGAGCTCGGTACCATGGCTGCGT<br>CGCCGGAGATG               |                                                     |
| TaSERK1-<br>(LUC-N)-<br>R               | TCCTTG TAGTCCATTTGTTGGATCCCCTCGGGCCG<br>GACAGCT                 |                                                     |
| TaSERK2-<br>(LUC-N)-<br>F               | AACACGGGGGACGAGCTCGGTACCATGGGGGCG<br>CTGCCGTGGG                 |                                                     |
| TaSERK2-<br>(LUC-N)-<br>R               | TCCTTG TAGTCCATTTGTTGGATCCCCTTGGCCCTG<br>ATAGCT                 |                                                     |
| TaSERK3-<br>(LUC-N)-<br>F               | AACACGGGGGACGAGCTCGGTACCATGGGGGCG<br>CCGCCGT                    |                                                     |
| TaSERK3-<br>(LUC-N)-<br>R               | TCCTTG TAGTCCATTTGTTGGATCCTCTTGGGCCAG<br>ACAGTT                 |                                                     |
| TaSERK5-<br>(LUC-N)-<br>F               | AACACGGGGGACGAGCTCGGTACCATGGCTGCGT<br>CGCCGGAGA                 |                                                     |
| TaSERK5-<br>(LUC-N)-<br>R               | TCCTTG TAGTCCATTTGTTGGATCCCCTCGGGCCG<br>GACAGCT                 |                                                     |
| TaSERK1-<br>ICD(FLA<br>G-HA)-<br>PICH-F | TACAATTATCGATACAATGGATTACAAGGATGACG<br>ACGATAAGCGGCGACGTAAACCTG | vectors<br>construction<br>for Co-IP<br>interaction |
| TaSERK1-<br>ICD(FLA<br>G-HA)-<br>PICH-R | TAAAGCAGGACAAGCttaAGCGTAGTCTGGGACGT<br>CGTATGGGTACCTCGGGCCCGACA |                                                     |
| TaSERK2-<br>ICD(FLA<br>G-HA)-<br>PICH-F | TACAATTATCGATACAATGGATTACAAGGATGACG<br>ACGATAAGCGCCGCAGGAAACCGC |                                                     |
| TaSERK2-<br>ICD(FLA<br>G-HA)-<br>PICH-R | TAAAGCAGGACAAGCttaAGCGTAGTCTGGGACGT<br>CGTATGGGTACCTTGGCCCTGATA |                                                     |
| TaSERK3-<br>ICD(FLA                     | TACAATTATCGATACAATGGATTACAAGGATGACG<br>ACGATAAGCGCCGCAGGAAACCGC |                                                     |

|                                         |                                                                          |                                                                                                         |
|-----------------------------------------|--------------------------------------------------------------------------|---------------------------------------------------------------------------------------------------------|
| G-HA)-<br>PICH-F                        |                                                                          |                                                                                                         |
| TaSERK3-<br>ICD(FLA<br>G-HA)-<br>PICH-R | TAAAGCAGGACAAGCttaAGCGTAGTCTGGGACGT<br>CGTATGGGTATCTTGGGCCAGACA          |                                                                                                         |
| TaSERK5-<br>ICD(FLA<br>G-HA)-<br>PICH-F | TACAATTATCGATACAATGGATTACAAGGATGACG<br>ACGATAAGCGGCGACGTAAACCTG          |                                                                                                         |
| TaSERK5-<br>ICD(FLA<br>G-HA)-<br>PICH-R | TAAAGCAGGACAAGCttaAGCGTAGTCTGGGACGT<br>CGTATGGGTACCTCGGGCCGACA           |                                                                                                         |
| TaBIR1-<br>ICD-<br>pBinGFP-<br>F        | CTGTACAAGGGTACCCCCGGGATGTGTCTGCGGA<br>AATTACCAGC                         |                                                                                                         |
| TaBIR1-<br>ICD-<br>pBinGFP-<br>R        | TCTAGTTCATCTAGAGGATCCTTACATGGCGACAA<br>TGAGCTC                           |                                                                                                         |
| TaBIR1full<br>-PICH-<br>HA-F            | TTACAATTATCGATACAATGTACCCATACGACGTC<br>CCAGACTACGCTATGGCAAATCATTATGCTCCT | HA-tagged<br>vector<br>construction<br>for TaBIR1<br>expression of<br>VIGS in <i>N.<br/>benthamiana</i> |
| TaBIR1full<br>-PICH-<br>HA-R            | CTCATTAAAGCAGGACAAGCTTACATGGCGACAA<br>TGAGCT                             |                                                                                                         |
| qRT-<br>NbActin-F                       | TGGTCGTACCACCGGTATTGTGTT                                                 | qRT-PCR<br>analysis of<br>VIGS in <i>N.<br/>benthamiana</i>                                             |
| qRT-<br>NbActin-<br>R                   | TCACTTGCCCATCAGGAAGCTCAT                                                 |                                                                                                         |
| qRT-<br>NbBAK1-<br>F                    | GAGGTGGGAGGAATGGCAAA                                                     |                                                                                                         |
| qRT-<br>NbBAK1-<br>R                    | TTGGCCCCGACAATTCATCT                                                     |                                                                                                         |
| qRT-<br>NbSOBIR<br>1-F                  | CCAGCAAGTCACAGAAGGGA                                                     |                                                                                                         |
| qRT-                                    | CCAACACCACACCAAAGCTG                                                     |                                                                                                         |

|                |  |  |
|----------------|--|--|
| NbSOBIR<br>1-R |  |  |
|----------------|--|--|
